# Supplementary material for: Secondary findings in a large Pakistani cohort tested with whole genome sequencing
Source: PubMed Central journal article supplement (PMC9838216; doi:10.26508/lsa.202201673), 2023-01-12
Supplement: LSA-2022-01673_review_history.pdf [file LSA-2022-01673_review_history.pdf]

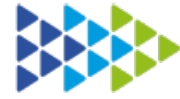

Life Science Alliance

# Secondary findings in a large Pakistani cohort tested with whole genome sequencing

Aliaksandr Skrahin, Huma Cheema, Maqbool Hussain, Nuzhat Rana, Khalil Rehman, Raman Kumar, Gabriela Oprea, Najim Ameziane, Arndt Rolf, and Volha Skrahina

DOI: <https://doi.org/10.26508/lsa.202201673>

Corresponding author(s): Aliaksandr Skrahin, Arcensus GmbH

---

## Review Timeline:

|                     |            |
|---------------------|------------|
| Submission Date:    | 2022-08-16 |
| Editorial Decision: | 2022-10-05 |
| Revision Received:  | 2022-11-21 |
| Editorial Decision: | 2022-12-08 |
| Revision Received:  | 2022-12-21 |
| Accepted:           | 2022-12-21 |

---

Scientific Editor: Novella Guidi

## Transaction Report:

(Note: With the exception of the correction of typographical or spelling errors that could be a source of ambiguity, letters and reports are not edited. The original formatting of letters and referee reports may not be reflected in this compilation.)

October 5, 2022

Re: Life Science Alliance manuscript #LSA-2022-01673-T

Aliaksandr Skrahin  
Arcensus GmbH Goethestr. 20 18055 Rostock, Germany  
Goethestr. 20  
Rostock 18055  
Germany

Dear Dr. Skrahin,

Thank you for submitting your manuscript entitled "Secondary findings in a large Pakistani cohort tested with whole genome sequencing" to Life Science Alliance. The manuscript was assessed by expert reviewers, whose comments are appended to this letter. We invite you to submit a revised manuscript addressing the Reviewer comments.

To upload the revised version of your manuscript, please log in to your account: <https://lsa.msubmit.net/cgi-bin/main.plex>

You will be guided to complete the submission of your revised manuscript and to fill in all necessary information. Please get in touch in case you do not know or remember your login name.

While you are revising your manuscript, please also attend to the below editorial points to help expedite the publication of your manuscript. Please direct any editorial questions to the journal office.

The typical timeframe for revisions is three months. Please note that papers are generally considered through only one revision cycle, so strong support from the referees on the revised version is needed for acceptance.

When submitting the revision, please include a letter addressing the reviewers' comments point by point.

We hope that the comments below will prove constructive as your work progresses.

Thank you for this interesting contribution to Life Science Alliance. We are looking forward to receiving your revised manuscript.

Sincerely,

Novella Guidi, PhD  
Scientific Editor  
Life Science Alliance

-----  
**A. THESE ITEMS ARE REQUIRED FOR REVISIONS**

-- A letter addressing the reviewers' comments point by point.

-- An editable version of the final text (.DOC or .DOCX) is needed for copyediting (no PDFs).

-- High-resolution figure, supplementary figure and video files uploaded as individual files: See our detailed guidelines for preparing your production-ready images, <https://www.life-science-alliance.org/authors>

-- Summary blurb (enter in submission system): A short text summarizing in a single sentence the study (max. 200 characters including spaces). This text is used in conjunction with the titles of papers, hence should be informative and complementary to the title and running title. It should describe the context and significance of the findings for a general readership; it should be written in the present tense and refer to the work in the third person. Author names should not be mentioned.

-- By submitting a revision, you attest that you are aware of our payment policies found here: <https://www.life-science-alliance.org/copyright-license-fee>

**B. MANUSCRIPT ORGANIZATION AND FORMATTING:**

Full guidelines are available on our Instructions for Authors page, <https://www.life-science-alliance.org/authors>

We encourage our authors to provide original source data, particularly uncropped/-processed electrophoretic blots and spreadsheets for the main figures of the manuscript. If you would like to add source data, we would welcome one PDF/Excel-file per figure for this information. These files will be linked online as supplementary "Source Data" files.

\*\*\*IMPORTANT: It is Life Science Alliance policy that if requested, original data images must be made available. Failure to provide original images upon request will result in unavoidable delays in publication. Please ensure that you have access to all original microscopy and blot data images before submitting your revision.\*\*\*

-----  
Reviewer #1 (Comments to the Authors (Required)):

Comments to the Author

In this article, the authors presented a compelling report of clinically actionable secondary findings on genetic variants identified by whole genome sequencing from a unique population. This Pakistani cohort includes index cases and healthy family members. The paper is an important contribution to research to improve publicly available genomic data diversity. However, the findings are similar to previously published surveys of the ACMG genes in exome and genome data. Overall, the strengths of this article include the unique population, the size and scope of the whole genome sequencing results, the identification of variants that are "clinically actionable" based on current American College of Medical Genetics guidelines, and the inclusion of non-ACMG SF list that could be specific to the characteristic of the studied population. However, there are several limitations/considerations which may further strengthen this article.

- The terms "Primary findings" and "Secondary Findings" should be clarified and adequately defined.
- The criteria used to analyze the potentially clinically significant non-ACMG variants should be better explained. The cohort of about 1000 Pakistani participants was used!! Is it a separate cohort of disease or healthy participants? What type of analysis was conducted on this cohort? What it's relevant to the studied cohort?
- An important point that needs to be brought out is the frequency of actionable variants for each diagnosis (and perhaps in aggregate). For example, it would be helpful to present the frequency of individuals who are genotype positive for an incidentally identified variant deemed LP/P and a corresponding frequency of those who also demonstrated evidence of that disease implicated by the variant.
- In Figure 1 and the manuscript, removing the variants associated with Familial hypercholesterolemia and Marfan syndrome would be better from the cardiovascular diseases list.
- Is it possible to include the GnomAD overall allele frequency for these variants to allow a reader to judge which variants appear to be unique or increased in frequency in the Pakistani population?

Reviewer #2 (Comments to the Authors (Required)):

In study by Skrahin et al 863 individuals from Pakistan were sequenced to study secondary findings. Pakistan is a developing country with very high proportion of consanguine marriages. Therefore genotyping that many individuals represents a very interesting and important effort and could help in treatment of many people. However, I find that the extensive dataset produced in this study wasn't used efficiently.

For comparison, one could take an earlier similar study with shared co-authors (Cheema et al 2020 <https://www.nature.com/articles/s41525-020-00150-z>, for some reason not cited in the current study), where clinical utility was clearly indicated.

In the current study results are presented in a very descriptive manner and basically summarize the numbers of gene-disease pairs. Many questions, which could be addressed with the sequenced data stay unanswered. Like for example, how the inbreeding coefficient would affect the frequencies of primary and secondary findings? Or how the gene regulatory elements are affected? One could imagine lots of other interesting questions, which could be immediately addressed in this kind of study without applying too much effort.

Since the results presented in the manuscript are purely descriptive, on the technical side there are just minor comments concerning presentation of data and manuscript language:

- 1) Instead of percentages of different categories of secondary findings, it is better to just indicate the actual numbers (like out of 24, 18 related to cardiovascular diseases and so on). Percentages are misleading when the numbers are so low.

2) For clinically affected patients, age SD exceeds the mean age, indicating a very abnormal distribution. Median should be provided in that case.

3) Multiple grammar errors in text should be taken care of. For example:

"the of use of different sequencing methods" (page 3).

"we propose the inclusion of addition genes the SF list" (page 10).

**Reviewer #1:**

In this article, the authors presented a compelling report of clinically actionable secondary findings on genetic variants identified by whole genome sequencing from a unique population. This Pakistani cohort includes index cases and healthy family members. The paper is an important contribution to research to improve publicly available genomic data diversity. However, the findings are similar to previously published surveys of the ACMG genes in exome and genome data. Overall, the strengths of this article include the unique population, the size and scope of the whole genome sequencing results, the identification of variants that are "clinically actionable" based on current American College of Medical Genetics guidelines, and the inclusion of non-ACMG SF list that could be specific to the characteristic of the studied population.

**Answer:** We are grateful to the reviewer for appreciating the importance of our study, emphasizing its strengths.

**Reviewer #1:**

However, there are several limitations/considerations which may further strengthen this article. The terms "Primary findings" and "Secondary Findings" should be clarified and adequately defined.

**Answer:** We have added extended definitions for "primary findings" and "secondary findings" in the Introduction (page 3, lines 2-14) and Methods (page 14, lines 13-16 and lines 23-26; page 15, lines 1-3) sections.

**Reviewer #1:**

The criteria used to analyze the potentially clinically significant non-ACMG variants should be better explained. The cohort of about 1000 Pakistani participants was used!! Is it a separate cohort of disease or healthy participants? What type of analysis was conducted on this cohort? What it's relevant to the studied cohort?

**Answer:** We have analysed only one Pakistani cohort. To avoid any confusion the reader might encounter, we have improved our language and provide more information under the Methods section (page 15, lines 12-26; page 16 lines 1-2)

**Reviewer #1:**

An important point that needs to be brought out is the frequency of actionable variants for each diagnosis (and perhaps in aggregate). For example, it would be helpful to present the frequency of individuals who are genotype positive for an incidentally identified variant deemed LP/P and a corresponding frequency of those who also demonstrated evidence of that disease implicated by the variant.

**Answer:** We have added the observed internal allele frequency to Supplement Tables S1 and S2.

**Reviewer #1:**

In Figure 1 and the manuscript, removing the variants associated with Familial hypercholesterolemia and Marfan syndrome would be better from the cardiovascular diseases list.

**Answer:** We agree that Marfan syndrome is a systemic connective tissue disorder and familial hypercholesterolemia is a metabolic disorder. However, we have categorized these as cardiovascular based on most recent guidelines to report secondary findings (Miller et al. 2021; Miller et al. 2022).

**Reviewer #1:**

Is it possible to include the GnomAD overall allele frequency for these variants to allow a reader to judge which variants appear to be unique or increased in frequency in the Pakistani population?

**Answer:** We have included the GnomAD overall allele frequency for the variants to allow readers to judge which variants appear to be unique or increased in frequency in the Pakistani population (Supplement Tables S1 and S2).

**Reviewer #2:**

In study by Skrahin et al 863 individuals from Pakistan were sequenced to study secondary findings. Pakistan is a developing country with very high proportion of consanguine marriages. Therefore, genotyping that many individuals represents a very interesting and important effort and could help in treatment of many people.

**Answer:** We thank the reviewer for this comment.

**Reviewer #2:**

However, I find that the extensive dataset produced in this study wasn't used efficiently. For comparison, one could take an earlier similar study with shared co-authors (Cheema et al 2020 <https://www.nature.com/articles/s41525-020-00150-z>, for some reason not cited in the current study), where clinical utility was clearly indicated.

**Answer:** We have included this publication in the Introduction section (page 4, lines 23-26; page 5, lines 1-5, as well as in the list of references (Cheema et al. 2020), and this has undoubtedly enriched our manuscript.

**Reviewer #2:**

In the current study results are presented in a very descriptive manner and basically summarize the numbers of gene-disease pairs. Many questions, which could be addressed with the sequenced data stay unanswered. Like for example, how the inbreeding coefficient would affect the frequencies of primary and secondary findings? Or how the gene regulatory elements are affected? One could imagine lots of other interesting questions, which could be immediately addressed in this kind of study without applying too much effort.

**Answers:** We agree with the reviewer's rational comment. Our manuscript leaves many questions unanswered. Since the descriptive character of our study was determined before the start of the study, the above questions unfortunately remained outside the scope of the study. We anticipate exploring these questions in our future research, and we are grateful to the reviewer for these valuable ideas.

**Reviewer #2:**

Since the results presented in the manuscript are purely descriptive, on the technical side there are just minor comments concerning presentation of data and manuscript language:

1) Instead of percentages of different categories of secondary findings, it is better to just indicate the actual numbers (like out of 24, 18 related to cardiovascular diseases and so on). Percentages are misleading when the numbers are so low.

**Answer:** Changed. We showed the results both in percentages and in actual numbers.

2) For clinically affected patients, age SD exceeds the mean age, indicating a very abnormal distribution. Median should be provided in that case.

**Answer:** Changed. We added median and range the Table 1.

3) Multiple grammar errors in text should be taken care of. For example:

"the of use of different sequencing methods" (page 3).

"we propose the inclusion of addition genes the SF list" (page 10).

**Answer:** Corrected. Other grammar errors also checked and corrected.

Cheema H, Bertoli-Avella AM, Skrahina V, Anjum MN, Waheed N, Saeed A, Beetz C, Perez-Lopez J, Rocha ME, Alawbathani S et al. 2020. Genomic testing in 1019 individuals from 349 Pakistani families results in high diagnostic yield and clinical utility. *NPJ Genom Med* **5**: 44.

Miller DT, Lee K, Abul-Husn NS, Amendola LM, Brothers K, Chung WK, Gollob MH, Gordon AS, Harrison SM, Hershberger RE et al. 2022. ACMG SF v3.1 list for reporting of secondary findings in clinical exome and genome sequencing: A policy statement of the American College of Medical Genetics and Genomics (ACMG). *Genet Med* **24**: 1407-1414.

Miller DT, Lee K, Chung WK, Gordon AS, Herman GE, Klein TE, Stewart DR, Amendola LM, Adelman K, Bale SJ et al. 2021. ACMG SF v3.0 list for reporting of secondary findings in clinical exome and genome sequencing: a policy statement of the American College of Medical Genetics and Genomics (ACMG). *Genet Med* **23**: 1381-1390.

December 8, 2022

RE: Life Science Alliance Manuscript #LSA-2022-01673-TR

Dr. Aliksandr Skrahin  
Arcensus GmbH  
Goethestr. 20  
Rostock 18055  
Germany

Dear Dr. Skrahin,

Thank you for submitting your revised manuscript entitled "Secondary findings in a large Pakistani cohort tested with whole genome sequencing". We would be happy to publish your paper in Life Science Alliance pending final revisions necessary to meet our formatting guidelines.

Along with points mentioned below, please tend to the following:

-please add a figure legend section to your manuscript, including your main figure legends and your table legends  
-we could not find the data in ClinVar using the information provided. A ClinVar accession number (VCV, RCV, or SCV) would be useful.

If you are planning a press release on your work, please inform us immediately to allow informing our production team and scheduling a release date.

LSA now encourages authors to provide a 30-60 second video where the study is briefly explained. We will use these videos on social media to promote the published paper and the presenting author (for examples, see <https://twitter.com/LSAJournal/timelines/1437405065917124608>). Corresponding or first-authors are welcome to submit the video. Please submit only one video per manuscript. The video can be emailed to [contact@life-science-alliance.org](mailto:contact@life-science-alliance.org)

To upload the final version of your manuscript, please log in to your account: <https://lsa.msubmit.net/cgi-bin/main.plex>  
You will be guided to complete the submission of your revised manuscript and to fill in all necessary information. Please get in touch in case you do not know or remember your login name.

To avoid unnecessary delays in the acceptance and publication of your paper, please read the following information carefully.

#### A. FINAL FILES:

These items are required for acceptance.

-- An editable version of the final text (.DOC or .DOCX) is needed for copyediting (no PDFs).

-- High-resolution figure, supplementary figure and video files uploaded as individual files: See our detailed guidelines for preparing your production-ready images, <https://www.life-science-alliance.org/authors>

-- Summary blurb (enter in submission system): A short text summarizing in a single sentence the study (max. 200 characters including spaces). This text is used in conjunction with the titles of papers, hence should be informative and complementary to the title. It should describe the context and significance of the findings for a general readership; it should be written in the present tense and refer to the work in the third person. Author names should not be mentioned.

#### B. MANUSCRIPT ORGANIZATION AND FORMATTING:

Full guidelines are available on our Instructions for Authors page, <https://www.life-science-alliance.org/authors>

We encourage our authors to provide original source data, particularly uncropped/-processed electrophoretic blots and spreadsheets for the main figures of the manuscript. If you would like to add source data, we would welcome one PDF/Excel-file per figure for this information. These files will be linked online as supplementary "Source Data" files.

**\*\*Submission of a paper that does not conform to Life Science Alliance guidelines will delay the acceptance of your manuscript.\*\***

**\*\*It is Life Science Alliance policy that if requested, original data images must be made available to the editors. Failure to provide**



original images upon request will result in unavoidable delays in publication. Please ensure that you have access to all original data images prior to final submission.\*\*

\*\*The license to publish form must be signed before your manuscript can be sent to production. A link to the electronic license to publish form will be sent to the corresponding author only. Please take a moment to check your funder requirements.\*\*

\*\*Reviews, decision letters, and point-by-point responses associated with peer-review at Life Science Alliance will be published online, alongside the manuscript. If you do want to opt out of having the reviewer reports and your point-by-point responses displayed, please let us know immediately.\*\*

Thank you for your attention to these final processing requirements. Please revise and format the manuscript and upload materials within 7 days.

Thank you for this interesting contribution, we look forward to publishing your paper in Life Science Alliance.

Sincerely,

Novella Guidi, PhD  
Scientific Editor  
Life Science Alliance

---

Reviewer #1 (Comments to the Authors (Required)):

The authors have addressed the critique

December 21, 2022

RE: Life Science Alliance Manuscript #LSA-2022-01673-TRR

Dr. Aliaksandr Skrahin  
Arcensus GmbH Goethestr. 20 18055 Rostock, Germany  
Goethestr. 20  
Rostock 18055  
Germany

Dear Dr. Skrahin,

Thank you for submitting your Research Article entitled "Secondary findings in a large Pakistani cohort tested with whole genome sequencing". It is a pleasure to let you know that your manuscript is now accepted for publication in Life Science Alliance. Congratulations on this interesting work.

The final published version of your manuscript will be deposited by us to PubMed Central upon online publication.

Your manuscript will now progress through copyediting and proofing. It is journal policy that authors provide original data upon request.

Reviews, decision letters, and point-by-point responses associated with peer-review at Life Science Alliance will be published online, alongside the manuscript. If you do want to opt out of having the reviewer reports and your point-by-point responses displayed, please let us know immediately.

\*\*\*IMPORTANT: If you will be unreachable at any time, please provide us with the email address of an alternate author. Failure to respond to routine queries may lead to unavoidable delays in publication.\*\*\*

Scheduling details will be available from our production department. You will receive proofs shortly before the publication date. Only essential corrections can be made at the proof stage so if there are any minor final changes you wish to make to the manuscript, please let the journal office know now.

#### DISTRIBUTION OF MATERIALS:

Authors are required to distribute freely any materials used in experiments published in Life Science Alliance. Authors are encouraged to deposit materials used in their studies to the appropriate repositories for distribution to researchers.

You can contact the journal office with any questions, [contact@life-science-alliance.org](mailto:contact@life-science-alliance.org)

Again, congratulations on a very nice paper. I hope you found the review process to be constructive and are pleased with how the manuscript was handled editorially. We look forward to future exciting submissions from your lab.

Sincerely,

Novella Guidi, PhD  
Scientific Editor  
Life Science Alliance
